# Supplementary material for: Analysis of mRNA processing at whole transcriptome level, transcriptomic profile and genome sequence refinement of Trypanosoma cruzi
Source: PubMed Central journal article supplement (PMC6874640; doi:10.1038/s41598-019-53924-6), 2019-11-22
Supplement: 41598_2019_53924_MOESM1_ESM.pdf [file 41598_2019_53924_MOESM1_ESM.pdf]

1 **Analysis of mRNA processing at whole transcriptome level, transcriptomic profile**  
 2 **and genome sequence refinement of *Trypanosoma cruzi*.**

3 Francisco Callejas-Hernández<sup>1</sup>, Ángel Gutierrez-Nogues<sup>1</sup>, Alberto Rastrojo<sup>1</sup>, Núria  
 4 Gironès<sup>\*1,2</sup> and Manuel Fresno<sup>\*1,2</sup>

5 1 Centro de Biología Molecular Severo Ochoa, Consejo Superior de Investigaciones  
 6 Científicas, Universidad Autónoma de Madrid, Cantoblanco, Madrid, Spain.

7 2 Instituto Sanitario de Investigación Princesa, Madrid, Spain.

8 \*Address correspondence to: mfresno@cbm.csic.es or ngirones@cbm.csic.es Tel: +34  
 9 91 1964565; Fax: +34 91 1964420;

10

11 **Supplementary Information**

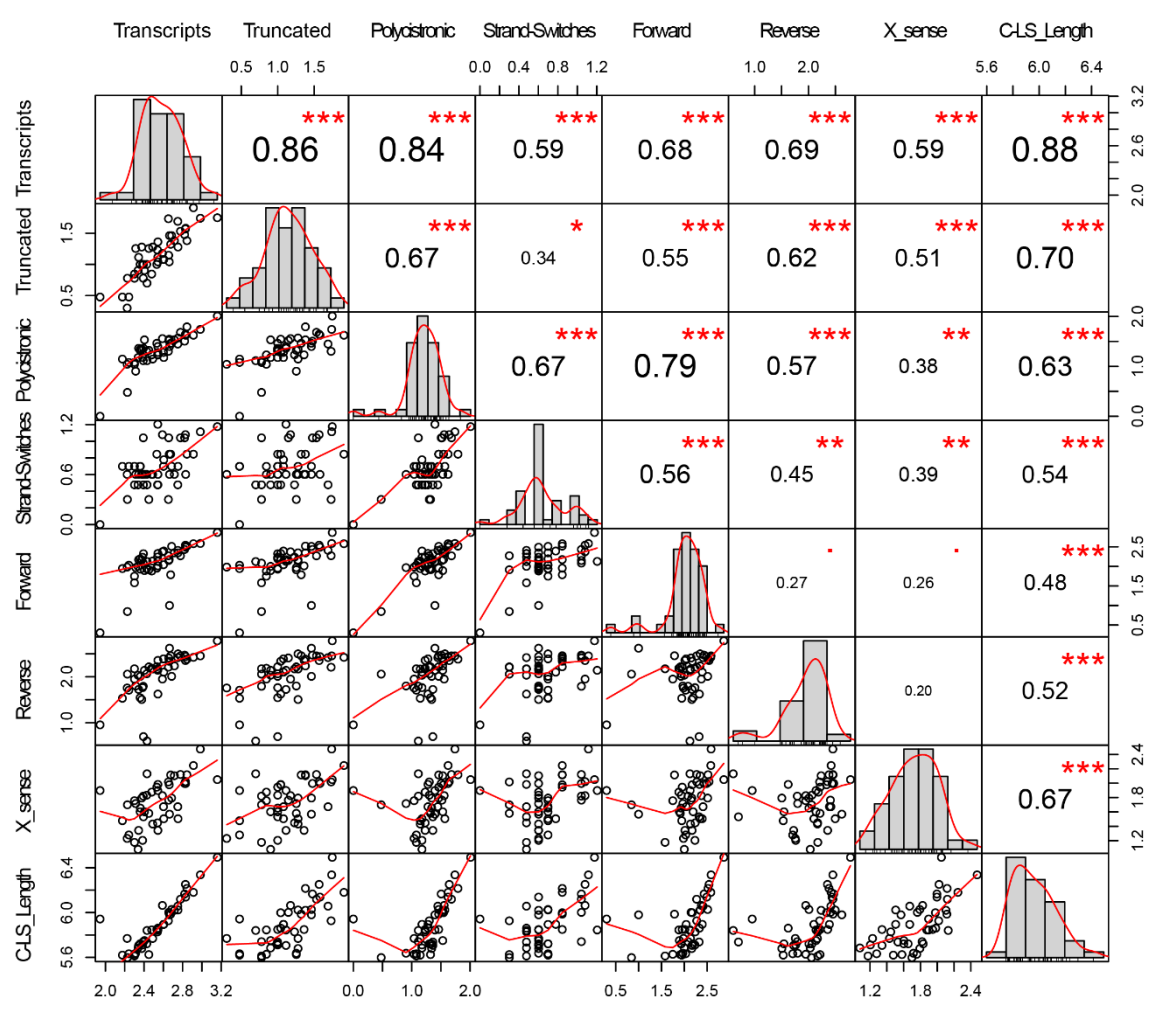

12

13 **Supplementary Figure 1.** Spearman correlation of Sylvio X10 transcriptome  
 14 annotations. Spearman correlation between the annotated features of Sylvio X10

15 transcriptome, “transcripts”, correspond to total transcripts, the number of polycistronic  
16 and truncated transcripts per chromosome are labelled as “polycistronic” and  
17 “truncated”, respectively, “Forward”, “Reverse” and “X\_sense” refers to the transcript  
18 sense, “Strand-switches” to the SSR identified and finally “C-LS\_length” corresponds to  
19 the chromosomal length. Data distribution is shown in diagonal histograms and density  
20 lines, lower matrix contains the bivariate scatter plots with a fitted line and the correlation  
21 value is shown in the upper matrix. P-values of the correlation are shown as red stars ( $\leq$   
22 to 0, 0.001, 0.01 corresponds to “\*\*\*”, “\*\*”, “\*”, respectively).

23

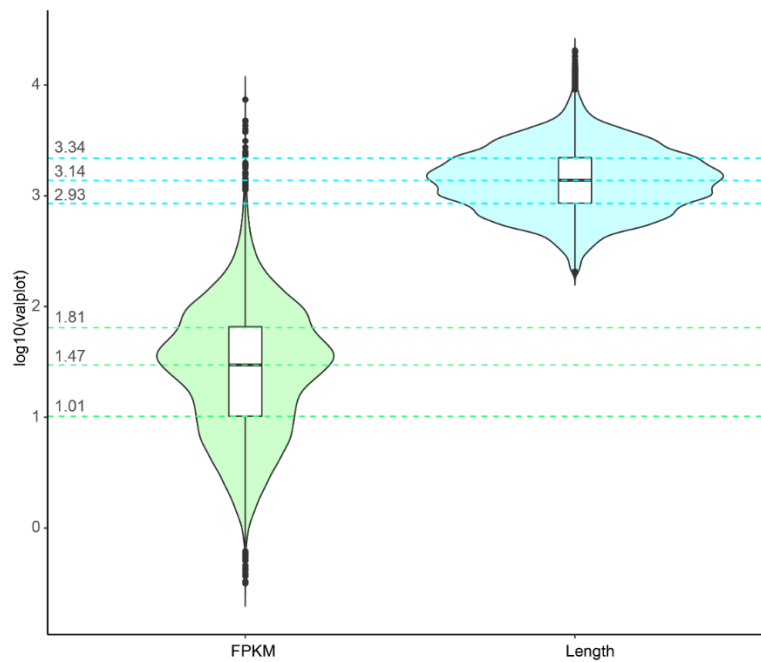

24

25 **Supplementary Figure 2.** FPKM values and length distribution of the complete  
26 transcriptome. Quartiles Q1, mean and Q3 are represented by dashed lines.

27

28

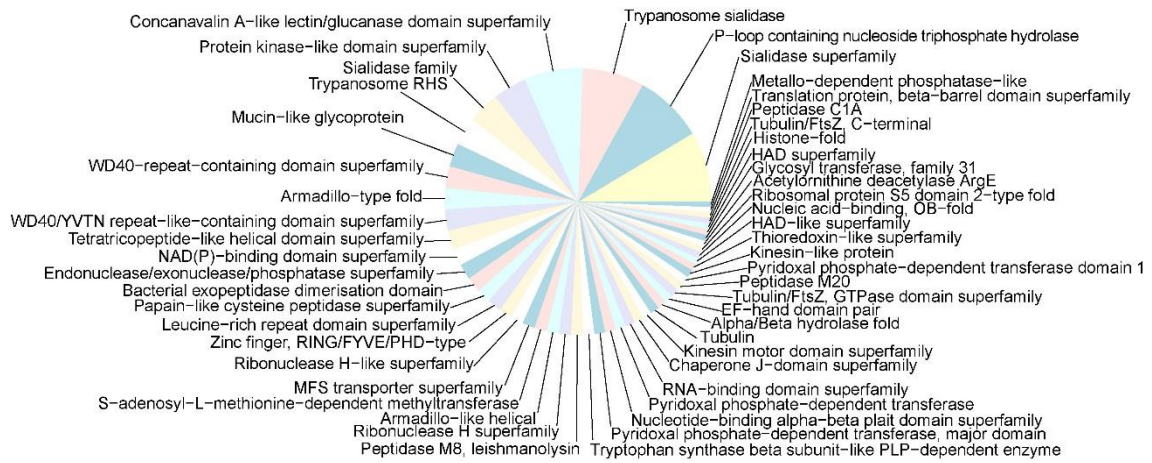

29

30 **Supplementary Figure 3.** More abundant transcripts in Sylvio X10 transcriptome.

31 Multicopy gene families more abundant copy-number based in *T. cruzi* tripomastigotes.
